# Supplementary material for: Nanoparticle mediated micromotor motion
Source: Royal Society of Chemistry journal article supplement (doi:10.1039/c4nr07558g), 2015-01-01
Supplement: c4nr07558g4.pdf [file c4nr07558g4.pdf]

## Supporting Information

# Nanoparticle Mediated Micromotor Motion

*Mei Liu,<sup>a</sup> Limei Liu,<sup>a</sup> Wenlong Gao,<sup>a</sup> Miaoda Su,<sup>a</sup> Ya Ge,<sup>a</sup> Lili Shi,<sup>a</sup> Hui Zhang,<sup>a</sup> Bin Dong,<sup>\*a</sup>*

*Christopher Li<sup>\*b</sup>*

<sup>a</sup>Institute of Functional Nano & Soft Materials (FUNSOM) and Collaborative Innovation Center (CIC) of Suzhou Nano Science and Technology, Soochow University, Suzhou 215123 (P. R. China),

<sup>b</sup>Department of Materials Science and Engineering, Drexel University, Philadelphia, PA 19104 (USA).

\* corresponding author, E-mail: bdong@suda.edu.cn, chrisli@drexel.edu

**Video S1.** One Pt-PCL micromotor moves autonomously in 10% H<sub>2</sub>O<sub>2</sub> aqueous solution.

**Video S2.** The motion and the remote control of a Pt-PCL-Fe<sub>3</sub>O<sub>4</sub>NP<sub>7500</sub> micromotor in 10% H<sub>2</sub>O<sub>2</sub> aqueous solution. The external magnetic field is applied around 2 s.

**Video S3.** The velocity changes of the Pt-PCL-Fe<sub>3</sub>O<sub>4</sub>NP<sub>7500</sub> micromotor before and after applying a 5 kV/m electric field. The 5 kV/m electric field is turned on around 3 s.

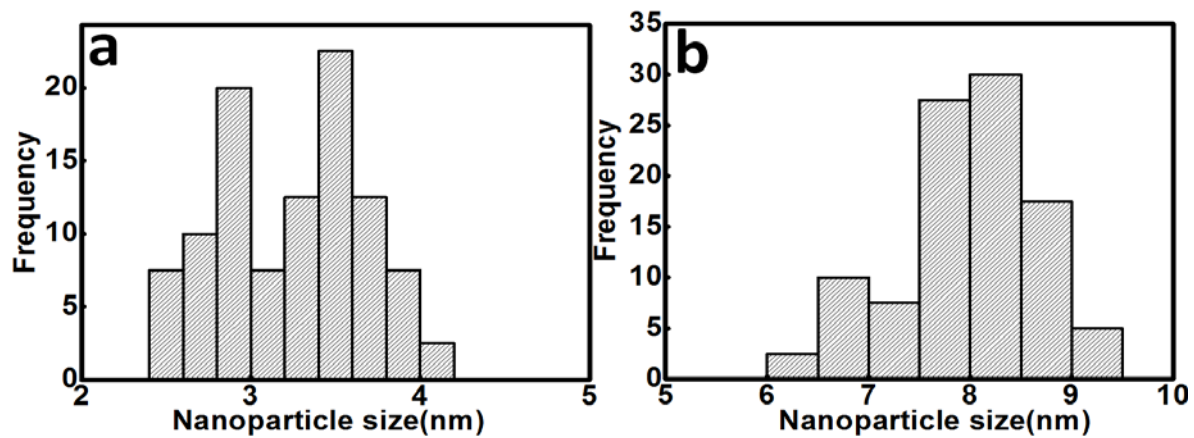

**Fig. S1** Size distribution histograms of PtNPs (a) and Fe<sub>3</sub>O<sub>4</sub>NPs (b) measured from Fig. 1 in the main text.

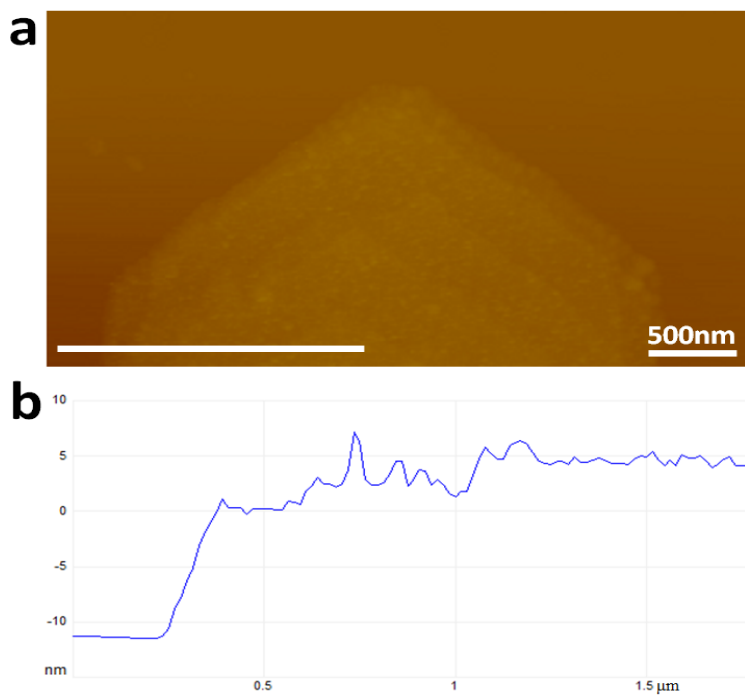

**Fig. S2** (a) AFM image of the Pt-PCL-Fe<sub>3</sub>O<sub>4</sub>NP<sub>7500</sub> micromotor and (b) the corresponding section analysis of (a).

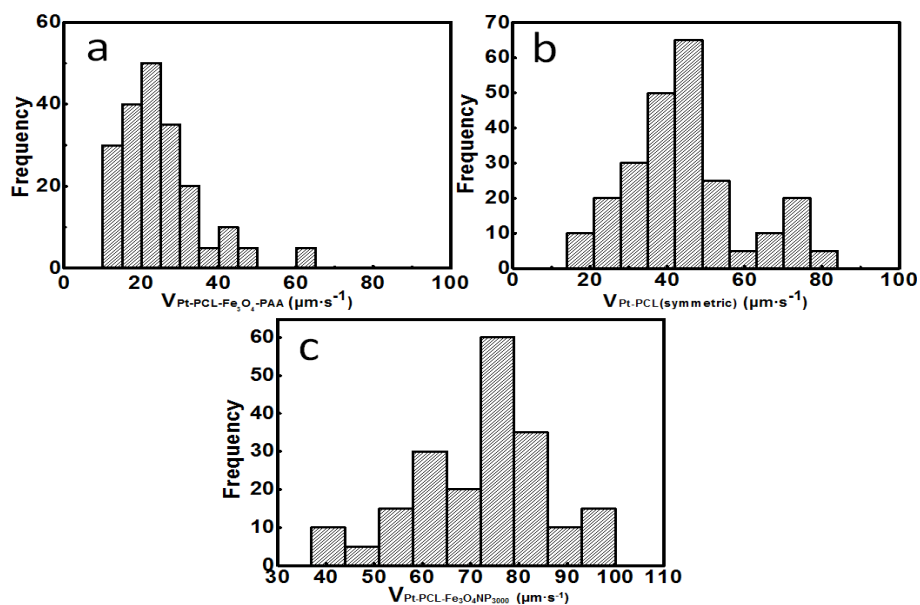

**Fig. S3** Histograms of the velocity ( $V$ ) of the Pt-PCL-Fe<sub>3</sub>O<sub>4</sub>-PAA (a), Pt-PCL(symmetric) (b) and Pt-PCL-Fe<sub>3</sub>O<sub>4</sub>NP<sub>3000</sub> (c) micromotors.

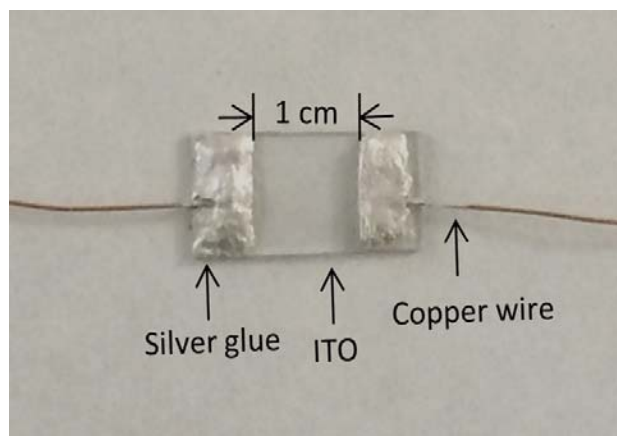

**Fig. S4** The setup utilized for the electric field experiment. The silver glue is pasted on the ITO surface with a separation of 1 cm. Then the copper wires, which are connected to a DC power supply, are also glued by utilizing the silver paste.

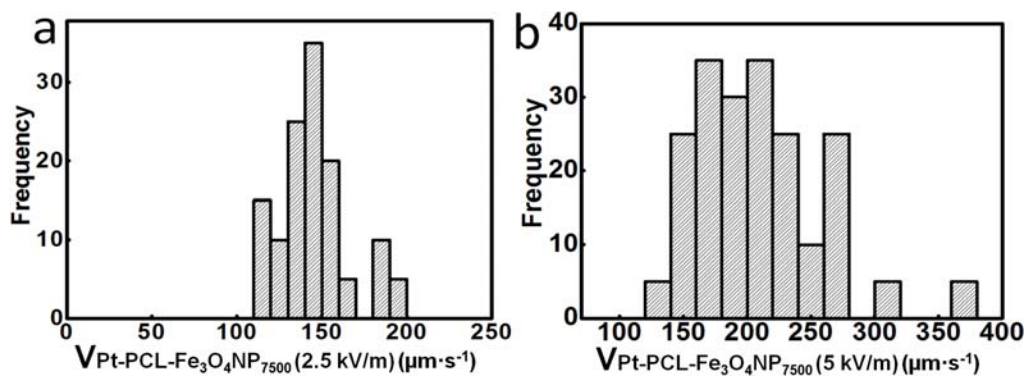

**Fig. S5** Histograms of the velocity ( $V$ ) of the Pt-PCL-Fe<sub>3</sub>O<sub>4</sub>NP<sub>7500</sub> micromotors when applying a 2.5 kV/m (a) and 5.0 kV/m (b) electric field.
